# Supplementary material for: TNFα and IL-1β modify the miRNA cargo of astrocyte shed extracellular vesicles to regulate neurotrophic signaling in neurons
Source: PubMed Central journal article supplement (PMC5838212; doi:10.1038/s41419-018-0369-4), 2018-03-05

Supplementary Figure 6

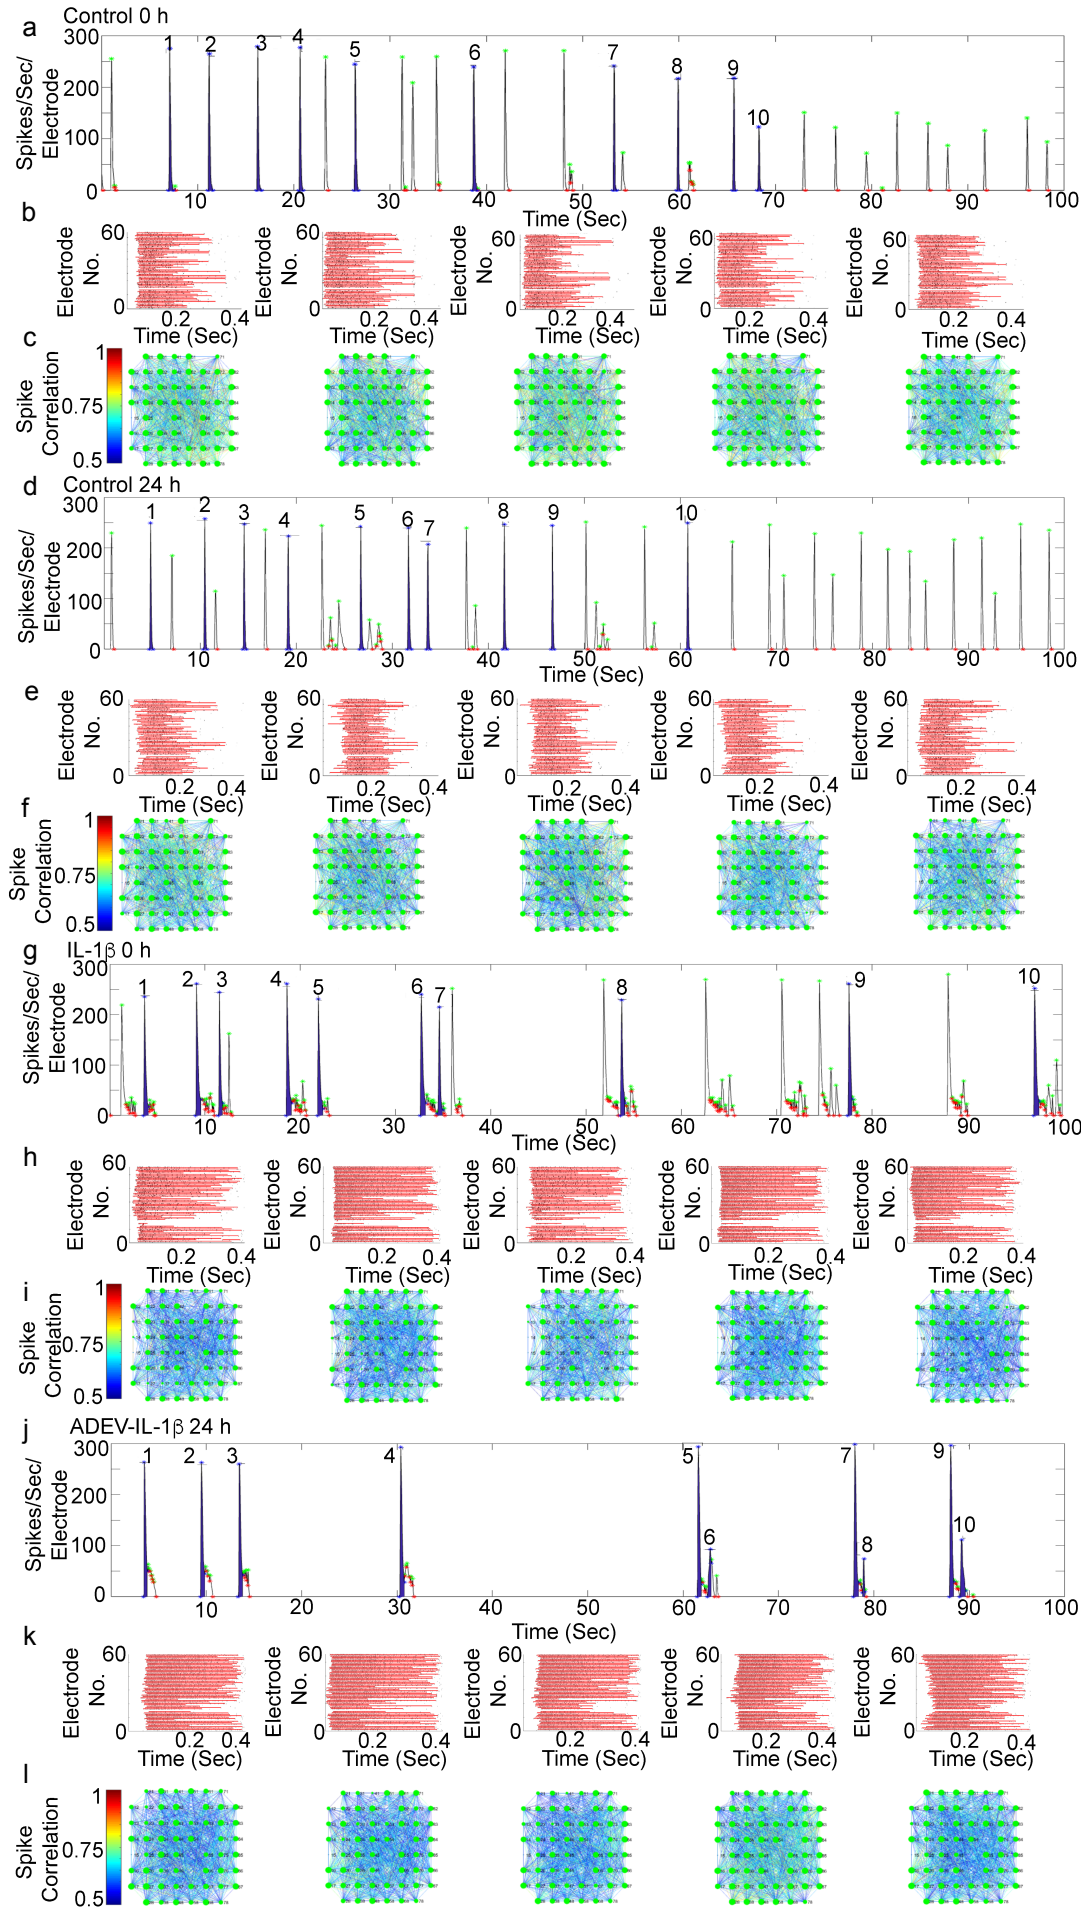

Supplement: 41419_2018_369_MOESM7_ESM.pdf [file 41419_2018_369_MOESM7_ESM.pdf]
